# Supplementary material for: Dietary Pattern Influences Gestational Weight Gain: Results from the ProcriAr Cohort Study—São Paulo, Brazil
Source: MDPI journal article supplement (doi:10.3390/nu14204428), 2022-10-21
Supplement: s1 [file s1]

Supplementary Table S2:

Factor loadings of food group's characteristic to the principal dietary components identified in each trimester in pregnant women. of the ProcriAr Cohort, São Paulo 2011-2013.

| Food Groups                       | First Trimester |           |         | Second Trimester |            |         | Third Trimester |         |           |
|-----------------------------------|-----------------|-----------|---------|------------------|------------|---------|-----------------|---------|-----------|
|                                   | Fruits and      | Brazilian | Western | Brazilian        | Fruits and | Western | Fruits and      | Western | Brazilian |
| Beans and Lentils                 | 0.3420          | 0.4694    |         |                  | 0.5439     |         |                 |         | 0.3931    |
| Butter or margarine               |                 | 0.5792    |         |                  |            | -0.5925 |                 |         | 0.6223    |
| Chocolate (powder)                |                 |           |         |                  |            |         |                 |         |           |
| Coffee sweetened                  |                 | 0.3619    | -0.3068 |                  |            |         |                 |         | 0.4134    |
| Rice white                        | 0.4543          | 0.4843    |         |                  | 0.6703     |         | 0.3431          |         | 0.3782    |
| Crackers                          |                 |           | -0.3003 |                  | 0.3533     |         |                 | -0.3320 |           |
| French bread                      |                 | 0.6428    |         |                  |            | -0.3731 |                 |         | 0.6283    |
| Fruits                            |                 |           |         | 0.4344           |            |         |                 | -0.3763 |           |
| Lean meats                        |                 |           |         |                  |            |         |                 |         |           |
| Mozzarella cheese                 |                 |           |         |                  |            |         |                 |         |           |
| Oil salad dressing                | 0.7565          |           |         | 0.6230           | 0.3011     |         | 0.7949          |         |           |
| Pork and Frankfurters             |                 |           |         |                  | 0.3907     |         |                 | 0.3901  |           |
| Potato and cassava boiled         |                 |           |         |                  |            |         |                 |         |           |
| Processed Meat and Snacks         |                 |           | 0.6237  |                  |            | 0.5044  |                 | 0.5042  |           |
| Salt                              | 0.4510          |           |         |                  |            |         | 0.7578          |         |           |
| Condiments                        |                 |           | 0.3559  |                  |            |         |                 |         |           |
| Soft Drinks                       |                 |           | 0.6640  |                  |            | 0.3708  |                 | 0.6885  |           |
| Fruit smoothed and soy beverage   |                 |           |         |                  |            |         |                 |         |           |
| Sweetened Juices                  |                 | -0.3184   |         |                  |            |         |                 |         |           |
| Sweetened tea                     |                 |           |         |                  |            |         |                 |         |           |
| Unsweetened juices                |                 |           |         |                  |            |         |                 |         |           |
| Vegetables                        | 0.7507          |           |         | 0.7327           |            |         | 0.7847          |         |           |
| Vinaigrette                       | 0.4511          |           |         |                  | 0.4741     |         | 0.5171          |         |           |
| Wheat bread and Brown Rice        |                 |           |         |                  |            |         |                 |         | -0.3428   |
| Milk and fat-reducing derivatives |                 |           |         |                  |            |         |                 |         |           |
| Cookies e Cakes                   |                 |           |         |                  |            | 0.3349  |                 | 0.5009  |           |
| Desserts and sweets               |                 |           |         |                  |            | 0.3685  |                 |         |           |
| Pasta                             |                 |           |         |                  |            |         |                 |         |           |
| Whole Milk and Yougurt            |                 |           |         |                  |            | -0.3128 |                 |         |           |
| Cereals and Farofa                |                 |           |         |                  |            |         |                 |         |           |
| Fried Meat, Chicken and eggs      |                 | 0.4043    |         |                  | 0.4322     |         |                 |         | 0.3384    |

Food groups presented had factor loadings  $\geq 0.3$  or  $\leq -0.3$  and were therefore used to describe each dietary pattern
