# Supplementary material for: Dietary Pattern Influences Gestational Weight Gain: Results from the ProcriAr Cohort Study—São Paulo, Brazil
Source: MDPI journal article supplement (doi:10.3390/nu14204428), 2022-10-21
Supplement: s1 [file s1]

Supplementary Table S1: Description of food groups and average intake per day for each trimester and for the set of trimester in pregnant women. ProcriAr study (n = 385) - São Paulo/Brazil,2011-2013

| Food Groups              | Grouping description                                                                                                              | 1º T       |              |            | 2ºT        |              |            | 3ºT        |              |            | Set of trimester |              |            |
|--------------------------|-----------------------------------------------------------------------------------------------------------------------------------|------------|--------------|------------|------------|--------------|------------|------------|--------------|------------|------------------|--------------|------------|
|                          |                                                                                                                                   | Intake (%) | Mean (g/day) | 95%CI      | Intake (%) | Mean (g/day) | 95%CI      | Intake (%) | Mean (g/day) | 95%CI      | Intake (%)       | Mean (g/day) | 95%CI      |
| Beans and Lentils        | Preparations or dishes with beans and/or lentils                                                                                  | 63.0       | 46.5         | 43.3- 49.8 | 68.4       | 55.3         | 52.5-58.0  | 68.1       | 53.1         | 49.8- 56.4 | 66.5             | 52.9         | 50.3-55.5  |
| Butter or margarine      | Butter or margarine (regular and salted)                                                                                          | 51.6       | 11.8         | 11.0-12.6  | 56.1       | 14.2         | 13.3-15.2  | 53.6       | 14.7         | 13.6-15.8  | 53.8             | 13.8         | 12.9-14.6  |
| Cakes and Cookies        | Simple cakes; Bakery with filling; Cookies; Brownies; sweet roll                                                                  | 18.7       | 15.2         | 13.6-16.8  | 29.1       | 25.4         | 23.0- 27.7 | 31.2       | 29.7         | 27.8-31.6  | 26.3             | 21.2         | 19.4- 23.0 |
| Cereal and <i>Farofa</i> | Cereal ready to eat and Oats; Farofa, cassava or corn (flour)                                                                     | 18.3       | 11.9         | 10.3- 13.5 | 20.6       | 11.7         | 10.6-12.7  | 21.2       | 13.1         | 10.7-15.4  | 20.0             | 11.0         | 9.6-12.4   |
| Chocolate (powder)       | Chocolate flavours; milk, mixtures and milk drinks; Ovomaltine - dry mix, Chocolate Malt                                          | 27.4       | 14.4         | 12.1-16.7  | 30.5       | 15.7         | 13.7-17.8  | 29.3       | 15.7         | 13.3-18.1  | 29.1             | 15.6         | 13.7-17.5  |
| Coffee sweetened         | Coffee, regular (caffeinated), made from ground; cappuccino, prepared from recipe or restaurant, regular, without flavoured syrup | 47.9       | 61.8         | 55.8-67.7  | 52.3       | 69.8         | 63.6-76.0  | 50.3       | 68.4         | 62.4-74.4  | 50.2             | 65.9         | 60.4-71.4  |

Supplementary Table S1: Description of food groups and average intake per day for each trimester and for the set of trimester in pregnant women. ProcriAr study (n = 385) - São Paulo/Brazil,2011-2013

| Food Groups         | Grouping description                                                                                                                                                                                           | 1º T       |              |             | 2ºT        |              |             | 3ºT        |              |             | Set of trimester |              |             |
|---------------------|----------------------------------------------------------------------------------------------------------------------------------------------------------------------------------------------------------------|------------|--------------|-------------|------------|--------------|-------------|------------|--------------|-------------|------------------|--------------|-------------|
|                     |                                                                                                                                                                                                                | Intake (%) | Mean (g/day) | 95%CI       | Intake (%) | Mean (g/day) | 95%CI       | Intake (%) | Mean (g/day) | 95%CI       | Intake (%)       | Mean (g/day) | 95%CI       |
| Crackers            | Crackers butter regular; sprinkle cookies; cookies and bars butter plain                                                                                                                                       | 24.4       | 11.28        | 9.9- 12.7   | 24.5       | 12.52        | 10.8-14.3   | 22.5       | 10.6         | 9.5-11.6    | 23.8             | 10.9         | 9.9-11.9    |
| Desserts and sweets | Ice cream and frozen desserts, milkshake; desserts with fruits and jelly; Candy, lollipop, whipped cream, coconut milk, condensed milk, chocolate, ice cream and bakery desserts - sweet pies, pudding, mousse | 85.1       | 66.4         | 62.4-70.5   | 86.9       | 66.9         | 63.5-70.2   | 84.9       | 74.5         | 69.8-79.2   | 85.6             | 70.5         | 66.7-74.4   |
| French bread        | Croissant; bagels; white bread; French bread; Italian bread; baguette ;etc                                                                                                                                     | 69.2       | 57.2         | 54.6-59.8   | 70.9       | 60.7         | 57.7-63.8   | 68.6       | 60.9         | 57.8-63.9   | 69.9             | 60.5         | 58.0-63.1   |
| Fruits              | Orange; banana; apple; papaya; pineapple; mango; avocado; guava; persimmon; grape ;etc                                                                                                                         | 55.7       | 149.7        | 141.2-158.2 | 48.1       | 129.7        | 119.1-140.3 | 45.7       | 122.8        | 112.1-133.6 | 42.3             | 134.0        | 124.5-143.6 |

Supplementary Table S1: Description of food groups and average intake per day for each trimester and for the set of trimester in pregnant women. ProcriAr study (n = 385) - São Paulo/Brazil,2011-2013

| Food Groups                     | Grouping description                                                                                                       | 1º T       |              |             | 2ºT        |              |             | 3ºT        |              |             | Set of trimester |              |             |
|---------------------------------|----------------------------------------------------------------------------------------------------------------------------|------------|--------------|-------------|------------|--------------|-------------|------------|--------------|-------------|------------------|--------------|-------------|
|                                 |                                                                                                                            | Intake (%) | Mean (g/day) | 95%CI       | Intake (%) | Mean (g/day) | 95%CI       | Intake (%) | Mean (g/day) | 95%CI       | Intake (%)       | Mean (g/day) | 95%CI       |
| Fruit smoothed and soy beverage | Various types of fruit smoothies with whole milk and soy milk drinks of various flavours                                   | 7.4        | 29.0         | 24.1-33.9   | 7.7        | 24.8         | 18.6-31.0   | 5.2        | 17.4         | 12.1-22.8   | 6.8              | 24.6         | 19.8-29.4   |
| Lean meats                      | Lean meats and fish (Beef with vegetables, chicken, boiled egg and fish - roasted, cooked, soaked or fried)                | 44.9       | 61.4         | 57.7-65.1   | 40.4       | 58.3         | 54.1-62.6   | 41.7       | 61.9         | 57.5-66.3   | 42.3             | 59.5         | 56.0-62.9   |
| Fried Meat, Chicken, eggs       | Beef (roasted, cooked or soaked); Beef jerky; Fried beef and fried chicken; Fried egg or omelette; Offal (heart and liver) | 48.6       | 58.0         | 56.5-59.4   | 54.5       | 69.1         | 64.7-73.4   | 52.9       | 72.4         | 66.4-78.4   | 52.0             | 67.1         | 64.0-70.2   |
| Whole Milk and Yogurt           | Whole milk; yogurt whole; yogurt with flavour                                                                              | 60.5       | 147.3        | 136.7-158.0 | 63.4       | 168.7        | 157.2-180.3 | 68.4       | 178.7        | 166.5-190.9 | 64.1             | 164.0        | 153.4-174.7 |

Supplementary Table S1: Description of food groups and average intake per day for each trimester and for the set of trimester in pregnant women. ProcriAr study (n = 385) - São Paulo/Brazil,2011-2013

| Food Groups           | Grouping description                                                                                                                                                                                           | 1º T       |              |           | 2ºT        |              |           | 3ºT        |              |            | Set of trimester |              |           |
|-----------------------|----------------------------------------------------------------------------------------------------------------------------------------------------------------------------------------------------------------|------------|--------------|-----------|------------|--------------|-----------|------------|--------------|------------|------------------|--------------|-----------|
|                       |                                                                                                                                                                                                                | Intake (%) | Mean (g/day) | 95%CI     | Intake (%) | Mean (g/day) | 95%CI     | Intake (%) | Mean (g/day) | 95%CI      | Intake (%)       | Mean (g/day) | 95%CI     |
| Mozzarella cheese     | American cheese, process; Cheddar cheese, process cheese spread; Brie cheese; Mozzarella cheese, whole milk; Parmesan cheese, dry (grated), regular; provolone cheese, natural; Mozzarella cheese, whole milk; | 16.2       | 5.0          | 4.3-5.7   | 14.9       | 4.2          | 3.6-4.9   | 13.9       | 3.2          | 2.6-3.8    | 15.0             | 4.0          | 3.5-4.5   |
| Oil salad dressing    | Dressing for salads; oil olive                                                                                                                                                                                 | 33.9       | 2.6          | 2.4-2.9   | 34.7       | 2.4          | 2.2-2.6   | 32.5       | 2.4          | 2.3-2.6    | 33.7             | 2.3          | 2.1-2.5   |
| Pasta                 | Pasta meatless and meat sauce; gnocchi; stuffed pasta                                                                                                                                                          | 35.1       | 67.9         | 65.8-70.0 | 34.0       | 69.1         | 63.0-75.3 | 35.5       | 65.2         | 61.7-68.7  | 34.8             | 64.8         | 60.7-68.8 |
| Pork and Frankfurters | Bacon regular; sausage pork; sausage smoked; pork fresh; pork steak                                                                                                                                            | 16.2       | 13.7         | 11.6-15.8 | 19.2       | 19.2         | 17.5-20.9 | 16.2       | 18.2         | 16.3- 20.1 | 17.2             | 14.3         | 12.6-16.0 |

Supplementary Table S1: Description of food groups and average intake per day for each trimester and for the set of trimester in pregnant women. ProcriAr study (n = 385) - São Paulo/Brazil,2011-2013

| Food Groups               | Grouping description                                                                                                                                                                                                                                                 | 1º T       |              |             | 2ºT        |              |             | 3ºT        |              |             | Set of trimester |              |             |
|---------------------------|----------------------------------------------------------------------------------------------------------------------------------------------------------------------------------------------------------------------------------------------------------------------|------------|--------------|-------------|------------|--------------|-------------|------------|--------------|-------------|------------------|--------------|-------------|
|                           |                                                                                                                                                                                                                                                                      | Intake (%) | Mean (g/day) | 95%CI       | Intake (%) | Mean (g/day) | 95%CI       | Intake (%) | Mean (g/day) | 95%CI       | Intake (%)       | Mean (g/day) | 95%CI       |
| Potato and cassava boiled | Potato, baked or boiled with skin or without skin ; sweet potato, baked or boiled; mashed potatoes, prepared from fresh; mashed potatoes, unknown if prepared from fresh or dehydrated; potato, roasted (includes Franconia); potato, au gratin, prepared from fresh | 20.4       | 25.0         | 24.5-25.4   | 17.5       | 25.2         | 22.1-28.3   | 17.8       | 20.4         | 18.5-22.4   | 18.6             | 20.6         | 18.9-22.4   |
| Processed Meat and Snacks | Hamburger, chicken nuggets, meatball, lunchmeats - ham, mortadella and salami; sandwiches - hot dog, hamburger; fried snacks, baked savoury, pizza and snacks                                                                                                        | 50.6       | 71.9         | 68.1-75.8   | 53.9       | 78.6         | 74.6- 82.7  | 52.1       | 78.9         | 74.5-83.4   | 52.2             | 75.9         | 71.5-80.2   |
| Rice white                | Preparations or dishes with white rice                                                                                                                                                                                                                               | 85.5       | 146.1        | 139.3-152.9 | 84.0       | 157.4        | 150.6-164.1 | 82.6       | 157.7        | 150.3-165.1 | 83.0             | 156.5        | 150.2-162.7 |
| Salt                      | Added salt                                                                                                                                                                                                                                                           | 40.1       | 0.59         | 0.49-0.62   | 39.9       | 0.6          | 0.48-0.63   | 34.4       | 0.45         | 0.42-0.47   | 38.1             | 0.51         | 0.47-0.56   |

Supplementary Table S1: Description of food groups and average intake per day for each trimester and for the set of trimester in pregnant women. ProcriAr study (n = 385) - São Paulo/Brazil,2011-2013

| Food Groups                       | Grouping description                                                                                              | 1º T       |              |             | 2ºT        |              |             | 3ºT        |              |             | Set of trimester |              |             |
|-----------------------------------|-------------------------------------------------------------------------------------------------------------------|------------|--------------|-------------|------------|--------------|-------------|------------|--------------|-------------|------------------|--------------|-------------|
|                                   |                                                                                                                   | Intake (%) | Mean (g/day) | 95%CI       | Intake (%) | Mean (g/day) | 95%CI       | Intake (%) | Mean (g/day) | 95%CI       | Intake (%)       | Mean (g/day) | 95%CI       |
| Condiments                        | Sauce cheese; ketchup regular; mustard; barbecue sauce; mayonnaise;                                               | 7.1        | 3.0          | 2.4-3.6     | 4.9        | 2.3          | 1.5-3.0     | 5.6        | 2.1          | 1.5-2.7     | 5.9              | 2.3          | 1.9-2.8     |
| Soft Drinks                       | Cola regular; soda pop; non-cola regular; coca diet                                                               | 39.0       | 155.8        | 142.7-168.8 | 44.8       | 194.2        | 180.1-208.3 | 44.5       | 228.2        | 216.4-240.0 | 42.8             | 187.3        | 174.5-200.1 |
| Sweetened Juices                  | Artificial juice (sweetened), natural juice (sweetened)                                                           | 50.9       | 159.6        | 142.9-176.4 | 53.0       | 149.0        | 129.4-168.5 | 52.2       | 178.3        | 159.8-196.9 | 52.0             | 167.6        | 146.7-188.4 |
| Milk and fat-reducing derivatives | milk, 2% fat or reduced fat; milk, 1% fat or low fat; milk, skim, non-fat or fat free; cream cheese; ricotta pate | 16.2       | 15.7         | 12.9-18.6   | 14.9       | 14.4         | 11.4-17.3   | 13.9       | 11.6         | 9.0-14.1    | 15.0             | 14.3         | 11.7-16.9   |
| Sweetened tea                     | Green tea; herbs; black; matte; mixed herbal and dried fruit (sweetened)                                          | 6.4        | 14.4         | 10.0-18.9   | 5.6        | 13.2         | 8.9-17.5    | 6.0        | 14.4         | 10.1-18.7   | 6.0              | 16.1         | 12.7-19.4   |
| Unsweetened juices                | Artificial juice (unsweetened), natural juice (unsweetened)                                                       | 16.1       | 60.4         | 52.2-68.6   | 14.7       | 58.1         | 49.2-67.0   | 16.4       | 73.6         | 65.2-82.0   | 15.7             | 59.6         | 52.1-67.1   |

Supplementary Table S1: Description of food groups and average intake per day for each trimester and for the set of trimester in pregnant women. ProcriAr study (n = 385) - São Paulo/Brazil,2011-2013

| Food Groups                | Grouping description                                                                                                                   | 1º T       |              |            | 2ºT        |              |            | 3ºT        |              |           | Set of trimester |              |            |
|----------------------------|----------------------------------------------------------------------------------------------------------------------------------------|------------|--------------|------------|------------|--------------|------------|------------|--------------|-----------|------------------|--------------|------------|
|                            |                                                                                                                                        | Intake (%) | Mean (g/day) | 95%CI      | Intake (%) | Mean (g/day) | 95%CI      | Intake (%) | Mean (g/day) | 95%CI     | Intake (%)       | Mean (g/day) | 95%CI      |
| Vegetables                 | Lettuce; spinach; watercress; kale; cabbage; cauliflower; tomato; carrot; eggplant; beets; chayote; pumpkin; cucumber; zucchini; onion | 58.1       | 63.0         | 58.8- 67.1 | 54.2       | 56.2         | 52.4- 59.9 | 47.9       | 46.6         | 43.7-49.6 | 53.4             | 54.2         | 50.7- 57.7 |
| Vinaigrette                | Onion, tomato, pepper, oil, salt, vinegar and parsley                                                                                  | 21.3       | 2.4          | 2.1-2.6    | 22.2       | 2.4          | 2.1-2.7    | 21.0       | 1.8          | 1.6- 2.1  | 21.5             | 2.1          | 1.8-2.3    |
| Wheat bread and Brown Rice | Wheat bread, brown rice                                                                                                                | 5.3        | 4.6          | 2.9-6.2    | 5.8        | 5.1          | 3.7-6.6    | 6.6        | 6.0          | 4.4-7.7   | 5.9              | 5.4          | 4.3-6.5    |
